# Supplementary material for: Climate and landscape jointly control Europe's hydrology
Source: Copernicus journal article supplement (doi:10.5194/egusphere-2025-6372), 2025-12-30
Supplement: Supplementary file [file egusphere-2025-6372-AC1-supplement.pdf]

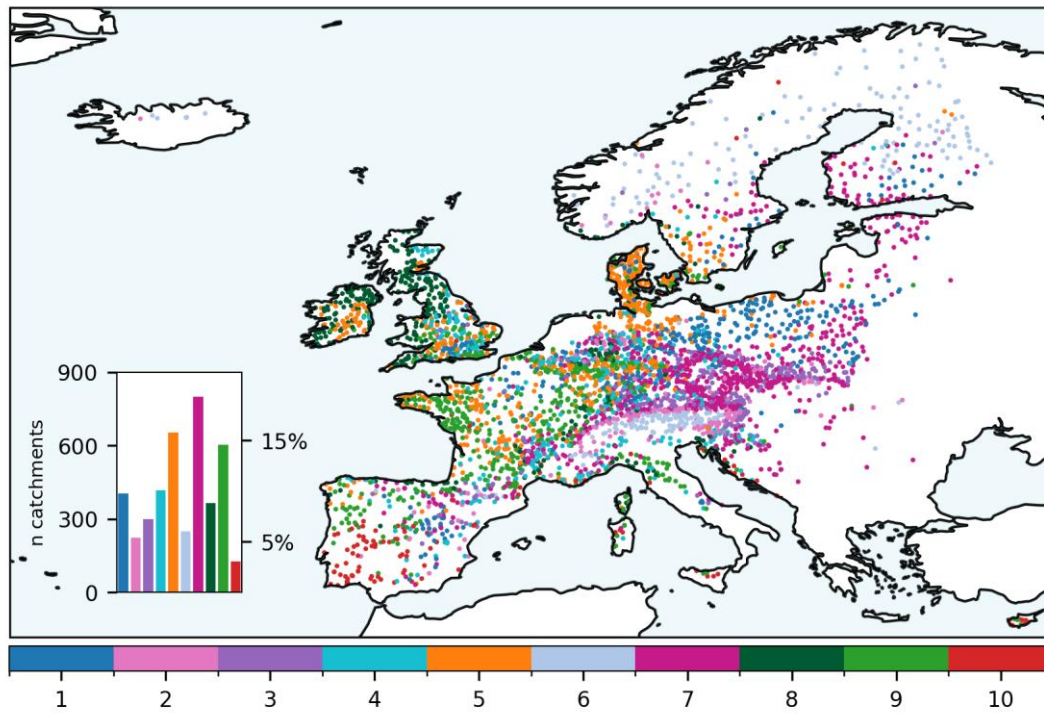

Figure C1. Classification of 4137 non-nested catchments into 10 HRT based on 40 hydrological signatures. The HRTs are ordered by increasing slope of the flow duration curves.

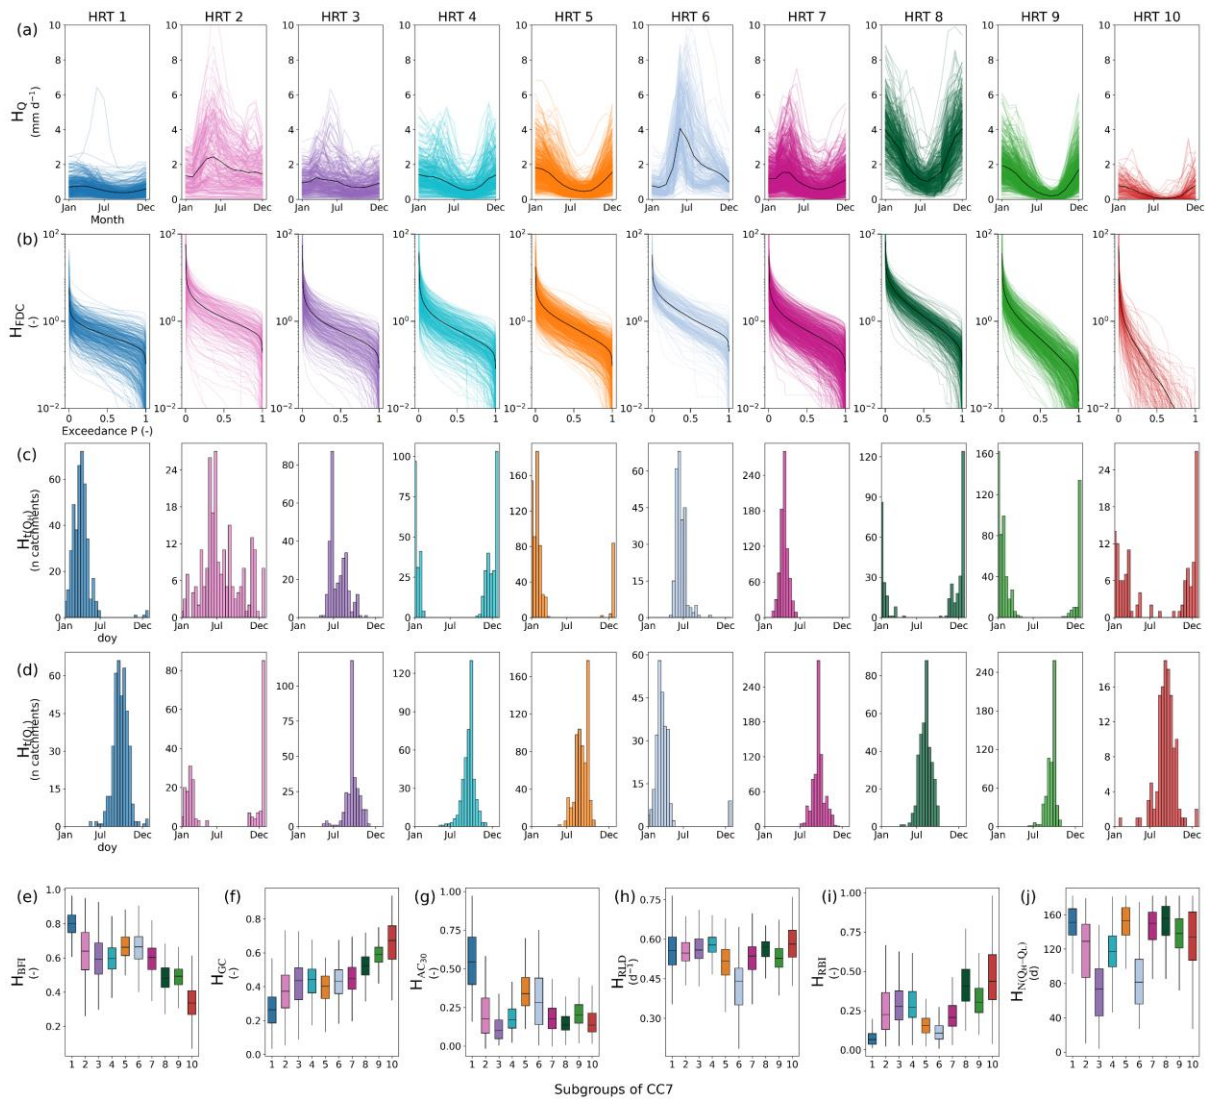

Figure C2. Visualization of 10 out of the 40 hydrological signatures across hydrological response types (HRTs) for the analysis of non-nested catchments.
